# Supplementary material for: An open platform for high-resolution light-based control of microscopic collectives
Source: bioRxiv or medRxiv preprint supplement (doi:10.1101/2020.12.28.424547), 2020-12-28
Supplement: Supplementary file [file media-1.pdf]

Supplementary Information for:  
**An open platform for high-resolution light-based control of  
microscopic collectives**

Ana Rubio Denniss, Thomas E. Gorochofski and Sabine Hauert

| <b>Supplementary Notes</b>                                                 | <b>Page</b> |
|----------------------------------------------------------------------------|-------------|
| Supplementary Note 1: Arena for <i>Volvox</i> experiments                  | 2           |
| <b>Supplementary Figures</b>                                               |             |
| Supplementary Figure 1: Characterization of projection and imaging modules | 3           |
| Supplementary Figure 2: Light spectra of projection module                 | 4           |
| Supplementary Figure 3: Latency of closed-loop control applications        | 5           |
| <b>Supplementary Tables</b>                                                |             |
| Supplementary Table 1: Breakdown of DOME component costs                   | 6           |
| <b>Supplementary Movie Captions</b>                                        |             |
| Supplementary Movie 1: Communication                                       | 7           |
| Supplementary Movie 2: Programmable messaging                              | 7           |
| Supplementary Movie 3: Stigmergy                                           | 7           |
| Supplementary Movie 4: Motion control                                      | 7           |

### **Supplementary Note 1: Arena for *Volvox* experiments**

To allow the free movement of *Volvox* colonies, a sample area (see image below) was constructed. A square chip of outer dimensions 25 mm x 25 mm with a 7.75 mm x 7.75 mm square cut from the middle was 3D printed in PLA and attached to a standard glass microscope slide using superglue adhesive. This square well has depth of 1.5 mm, allowing *Volvox* colonies of 350–500  $\mu\text{m}$  in diameter to move freely in the x-y plane, with some limited movement in the z plane.

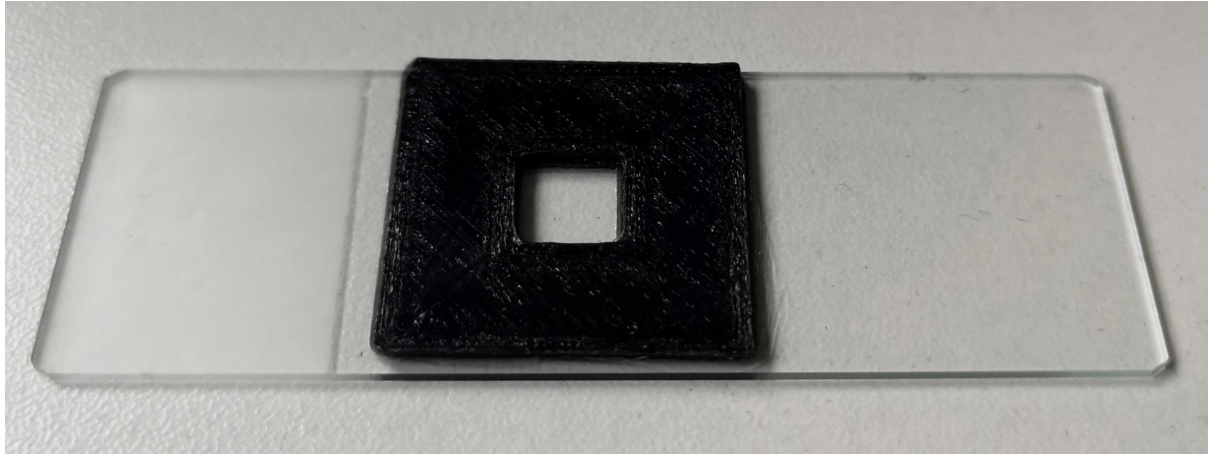

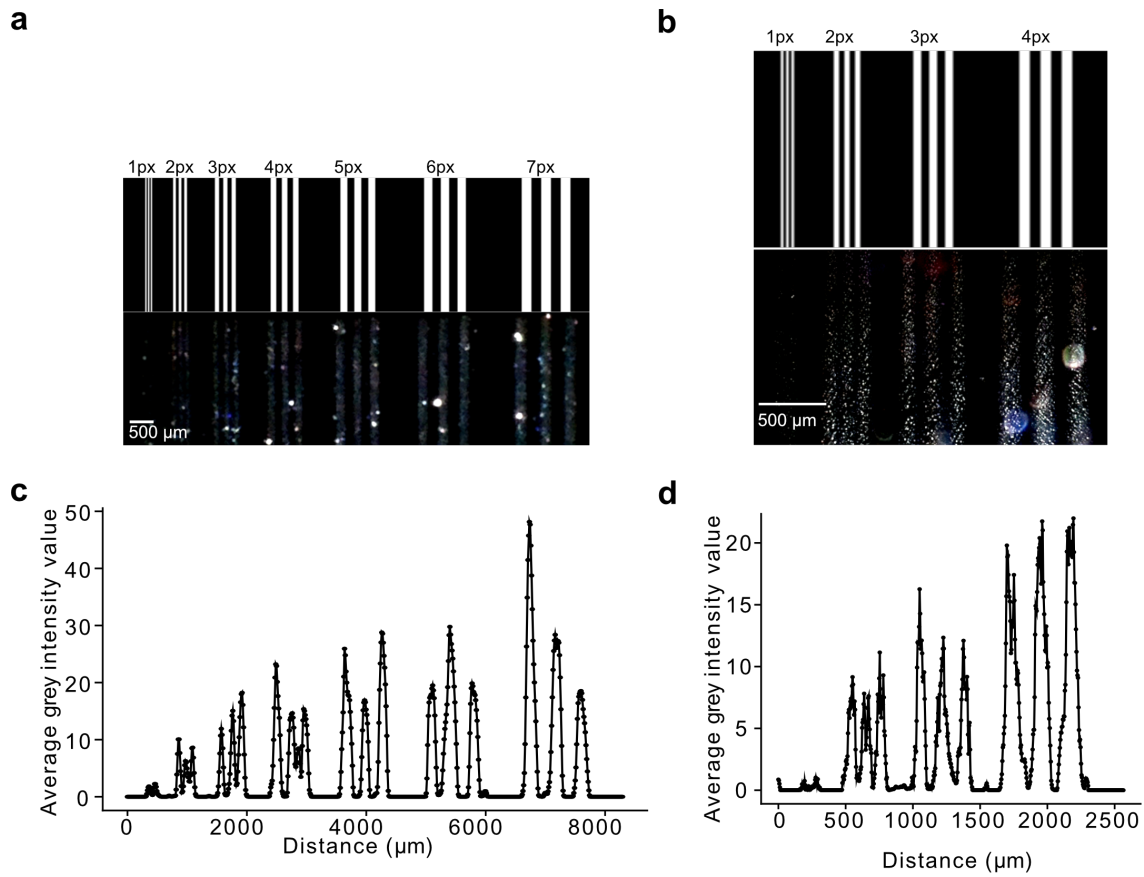

**Supplementary Figure 1: Characterisation of projection and imaging modules.** (a) Projection image of line triplets of increasing width up to 7 pixels for 9X magnification (upper) and corresponding camera image (lower). (b) Projection image of line triplets of increasing width up to 4 pixels for 90X magnification (upper) and corresponding camera image (lower). (c) Intensity plot across test image for 9X magnification, measured as the average grey-scale value for each pixel column in the image. (d) Intensity plot across test image for 90X magnification, measured as the average grey-scale value for each pixel column in the image.

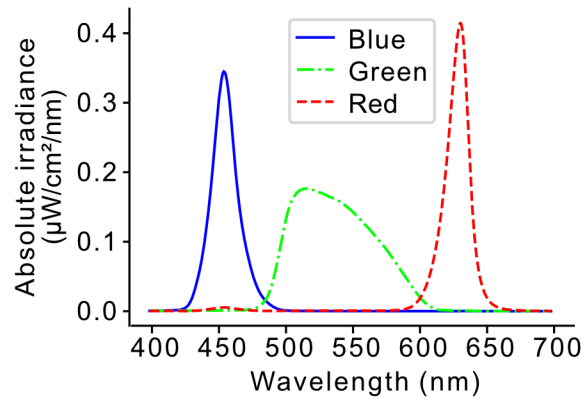

**Supplementary Figure 2: Light spectra of projection module.** Spectra of light emission from the projection module showing clear separation of the red, green and blue LEDs.

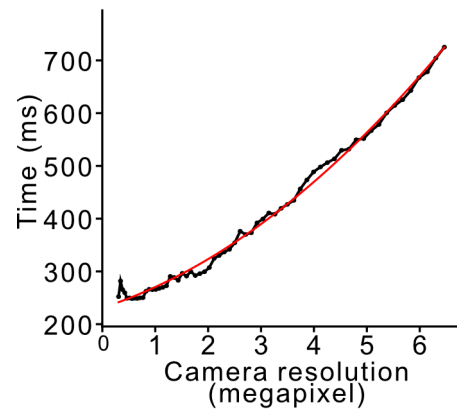

**Supplementary Figure 3: Latency of closed-loop control applications.** Latency of closed-loop control as a function of camera resolution. Red line shows a second order polynomial fit of  $y = 6.8x^2 + 32.6x + 231$ .

**Supplementary Table 1: Breakdown of DOME component costs.**

| <i>Optical</i>                                                  | <b>Cost (£)<sup>a</sup></b> |
|-----------------------------------------------------------------|-----------------------------|
| Projector (DLP Lightcrafter Display 2000 EV, Texas Instruments) | 109                         |
| Condenser lens (50mm Diameter PCX , Edmund Optics)              | 37                          |
| Tube lens (9X Eyepiece Cell Assembly, Edmund Optics)            | 61                          |
| 10X objective (Semi-Plan Standard Objective, Edmund Optics)     | 122                         |
| Glass diffuser (DG10-1500, Thor Labs)                           | 15                          |
| Neutral density filter (NE10B-A, Thor Labs)                     | 47                          |
| Longpass filter (FEL0500, Thor Labs)                            | 60                          |
| <i>Electrical</i>                                               |                             |
| Raspberry Pi (Raspberry Pi 4 Model 4GB, The Pi Hut)             | 54                          |
| Raspberry Pi (Raspberry Pi Zero W, The Pi Hut)                  | 9                           |
| Camera (Raspberry Pi Camera V2, The Pi Hut)                     | 24                          |
| 2 × SD card (SanDisk Ultra 16GB microSDHC, Amazon)              | 14                          |
| Interface PCB (Pi Zero W DLP2000EVM adaptor board, Tindie)      | 3                           |
| Power supply (UK Raspberry Pi 4 Power Supply The Pi Hut)        | 8                           |
| Power supply (Raspberry Pi 3 Universal Power Supply)            | 8                           |
| <i>Mechanical</i>                                               |                             |
| PLA filament (Black Premium PLA 1.75mm, FilaPrint)              | 28                          |
| Linear rail set (Glvanc 3D Printer Guide Rail Sets, Amazon)     | 21                          |
| x-y stage (Zetiling Microscope Moveable Stage, Amazon)          | 15                          |
| Linear Motion Ball Bearing (LM8LUU, Amazon)                     | 7                           |
| Lighting and fastening sundries                                 | 41                          |
| <b>Total cost</b>                                               | <b>685</b>                  |

a. All prices given to the nearest pound (£) and inclusive of 20% VAT.

## Supplementary Movie Captions

**Supplementary Movie 1: Communication.** Light-based communication between motile *Volvox* colonies with a 20 px communication range. Non-messaging *Volvox* appear in red due to illumination by a uniform red background light, while messaging *Volvox* are illuminated in cyan. Propagation of the message can be seen throughout the population over time.

**Supplementary Movie 2: Programmable messaging.** Programmable messaging between *Volvox* colonies. A blue and green seed are initialized and propagate through the population until a majority in the mixed state colored in cyan is reached.

**Supplementary Movie 3: Stigmergy.** Light-based stigmergy with *Volvox* colonies depositing light trails in cyan. Agents can be seen to change velocity upon encountering a light trail.

**Supplementary Movie 4: Motion control.** Selective light-based control of *Volvox* movement. Half the *Volvox* population (randomly selected) are illuminated with blue light for 2 frames every 10 frames, causing a slowing of their movement.
